# Supplementary material
Source: PubMed Central journal article supplement (PMC6738898)

# S1A

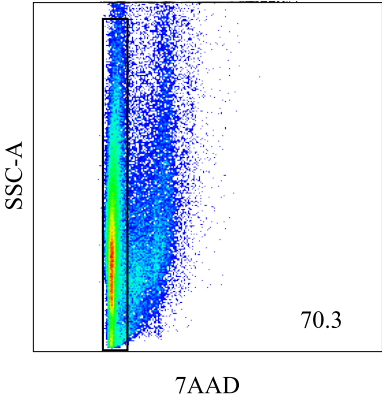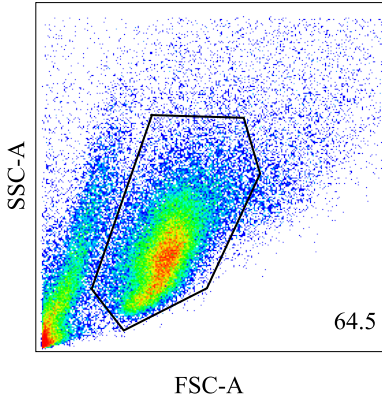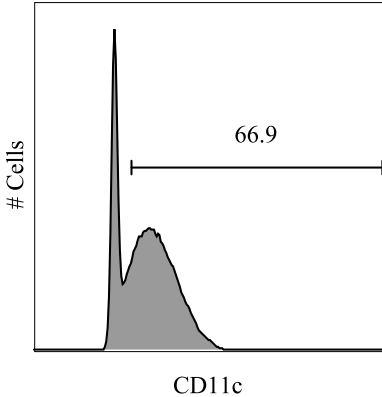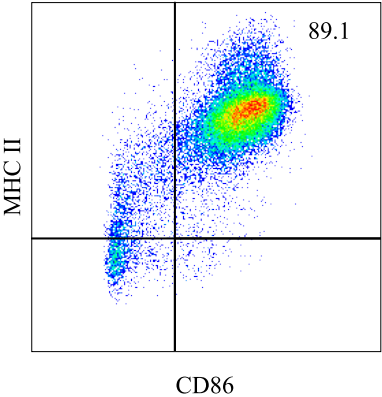

Supplement: jin-0007-0199-s01.pdf [file jin-0007-0199-s01.pdf]

# S1B

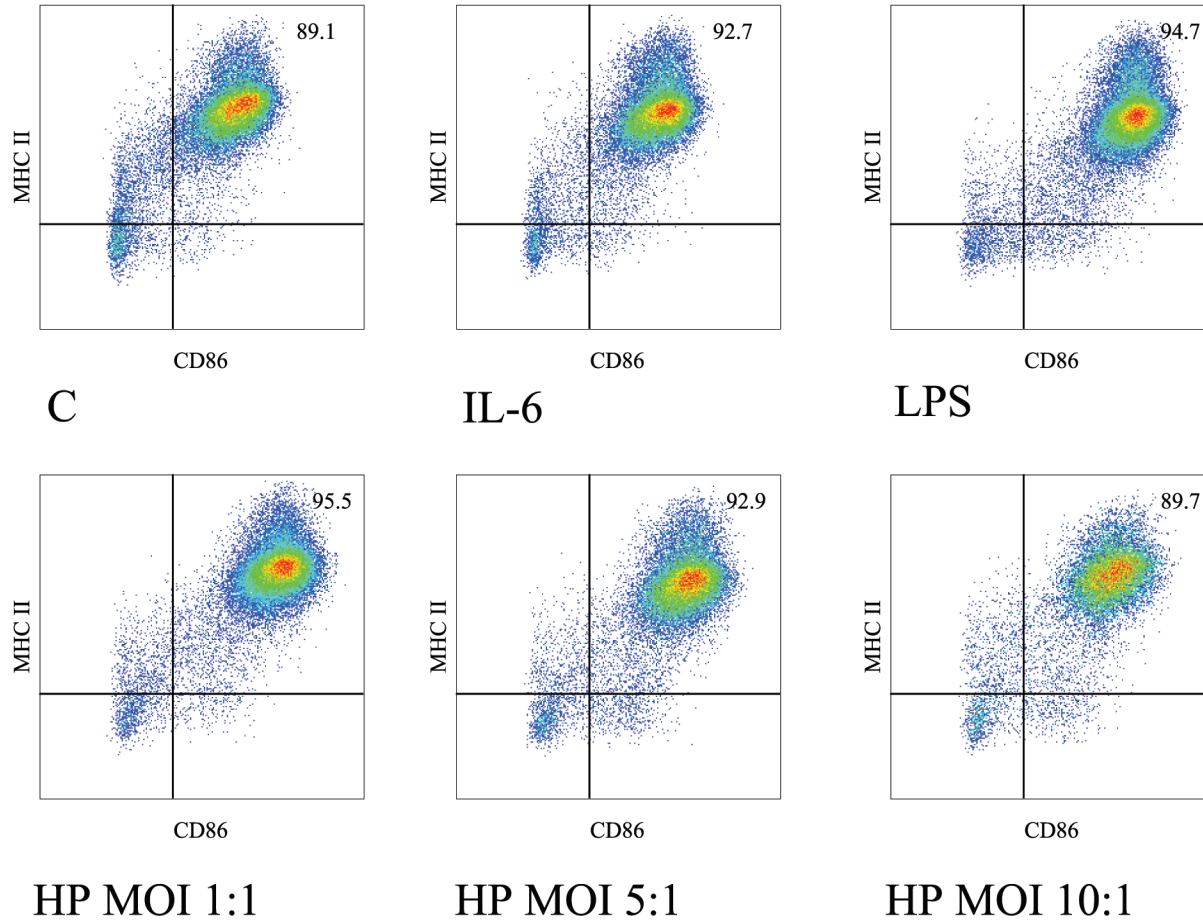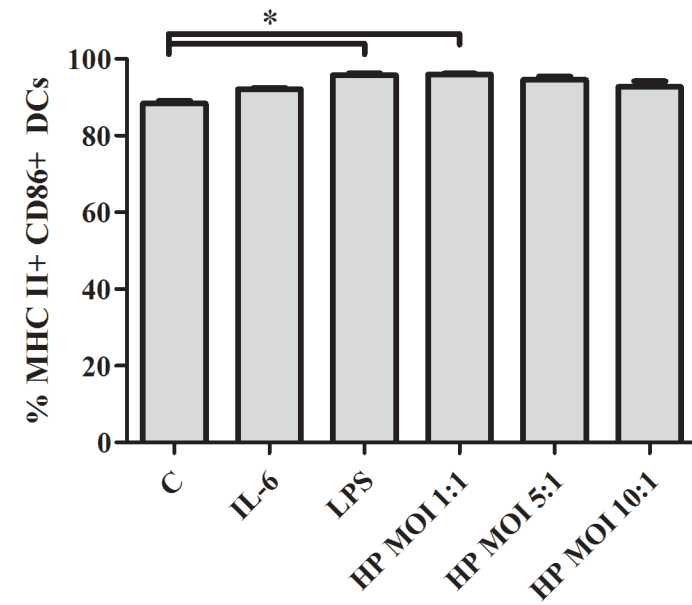

Supplement: jin-0007-0199-s02.pdf [file jin-0007-0199-s02.pdf]

# S1C

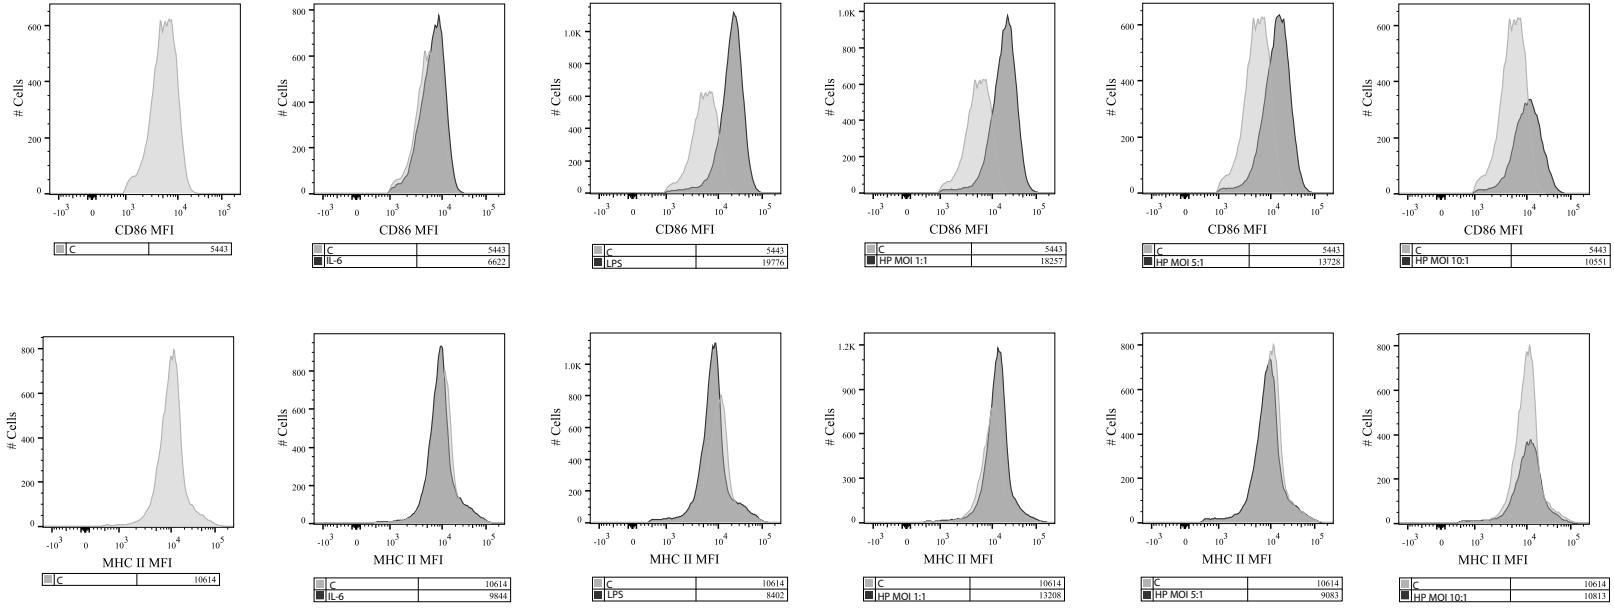

Supplement: jin-0007-0199-s03.pdf [file jin-0007-0199-s03.pdf]
